# Supplementary material for: Failure of extra-embryonic progenitor maintenance in the absence of dosage compensation
Source: Oxford University Press journal article supplement (doi:10.1242/dev.076497), 2012-05-10
Supplement: dev076497table_s1.pdf [file dev076497table_s1.pdf]

Allele-specific RT primers

| <u>Gene</u>  | <u>Fw Primer</u>        | <u>Rv Primer</u>        | <u>Primer used for RT</u> | <u>Restriction Enzyme</u> | <u>Allele Cut</u> | <u>Reference</u>     |
|--------------|-------------------------|-------------------------|---------------------------|---------------------------|-------------------|----------------------|
| <i>Atrx</i>  | GGGATTGCTGCTGTGAGTCT    | CCACCATCTTCTTGCCATCT    | Random Hexamers           | BsmAI                     | JF1               | Kalantry et al, 2009 |
| <i>Ddx3x</i> | CAGTTCGCTCAGGAAAAAG     | AATGAGGTGGCAAGACCAAG    | Random Hexamers           | EcoRV                     | 129               | Kalantry et al, 2009 |
| <i>Pdha1</i> | GGGACGTCTGTTGAGAGAGC    | GCACCTCAAAGGGAGGATCA    | Random Hexamers           | DpnII                     | JF1               | Kalantry et al, 2009 |
| <i>Rnf12</i> | GAGCCCCGATGAAAATAGAGC   | GGTCGGCACTTCTGTTACTGC   | Random Hexamers           | HaeIII                    | 129               | Huynh and Lee, 2003  |
| <i>Ube1x</i> | AGCCCATGGAGATCAAAGTG    | GAGCACAGAATTGGTGCAGA    | Random Hexamers           | HaeIII                    | JF1               | Kalantry et al, 2009 |
| <i>Utx</i>   | CCAGAAGTCCTTGAAGCAG     | CTGAGGTTGGTTGCAGGATT    | Random Hexamers           | MfeI                      | 129               | Kalantry et al, 2009 |
| <i>Xist</i>  | TGCTGAGATAAGAAAATCCACCA | CTCACCCCACTTGTCTTTGTT   | ATGAAGCTCCTCTCACACATGA    | MboII                     | 129               | N/A                  |
| <i>Kdm5c</i> | AGACAGGTTTTGGCCTCTGA    | TACCTTTTCAGGACTGGTCACAC | Random Hexamers           | MlyI                      | 129               | N/A                  |
| <i>Pgk1</i>  | GAAGGGAAGGAAAAGATGC     | TGTGCCAATCTCCATGTTGT    | Random Hexamers           | ScrFI                     | 129               | N/A                  |
| <i>Atp7a</i> | CAGACTCAAAGACCTCCA      | GGTCATCCCTCCACTTTCA     | Random Hexamers           | HinFI                     | 129               | N/A                  |
| <i>Rhox6</i> | ATGGATGGGTGGATGAAT      | CTCAGAAGAAGCCATCCTCATC  | Random Hexamers           | HpyCH4IV                  | JF1               | N/A                  |

qPCR Primers:

| <u>Gene</u>   | <u>Fw Primer</u>       | <u>Rv Primer</u>       | <u>Primer used for RT</u> |
|---------------|------------------------|------------------------|---------------------------|
| <i>Cdx2</i>   | GAAACCTGTGCGAGTGGATG   | CTTTTCCTCCTGATGGTATGT  | Random Hexamers           |
| <i>Ascl2</i>  | AGGACGCAATAAGCTAAGCATC | AAGTGGACGTTTGCACCTTC   | Random Hexamers           |
| <i>Eomes</i>  | ACCCAGCTAAAGATCGACCATA | CGTTATAATATCGGGCTTGAGG | Random Hexamers           |
| <i>Hand1</i>  | AGGATGCACAAGCAGGTGAC   | GCGCCCTTTAATCCTCTTCT   | Random Hexamers           |
| <i>Gcm1</i>   | AATGGACCCCTGAAGCTTATTC | GCACCTTCTTCATGGCTCTTCT | Random Hexamers           |
| <i>Tpbpa</i>  | AAGAGGAGGAAAACAACCACA  | ATGTTGGGGCAGAGATTTCTTA | Random Hexamers           |
| <i>Pr13d*</i> | GACATTAAGGGCAGAAACCTTG | AACGGCAAAAAGATGAGTGTCT | Random Hexamers           |

\* does not discriminate among *Pr13d1* , *Pr13d2* , and *Pr13d3*

Xist FISH Probe primers

|           |                            |
|-----------|----------------------------|
| XistEx1fw | TCAATGGTCTTCAAGGTAAGACTTC  |
| XistEx1rv | TCAAATTTAATCCATCCAGTCACCTT |
